# Supplementary material
Source: HighWire-hosted journal article supplement (https://www.cmajopen.ca/highwire/filestream/80953/field_highwire_adjunct_files/0/open-2014-0128-1-at.pdf)

**Appendix 1 (as supplied by the authors): National and provincial age pyramids**

**Figure S1: Age pyramid: CPCSSN vs. Census National Data**

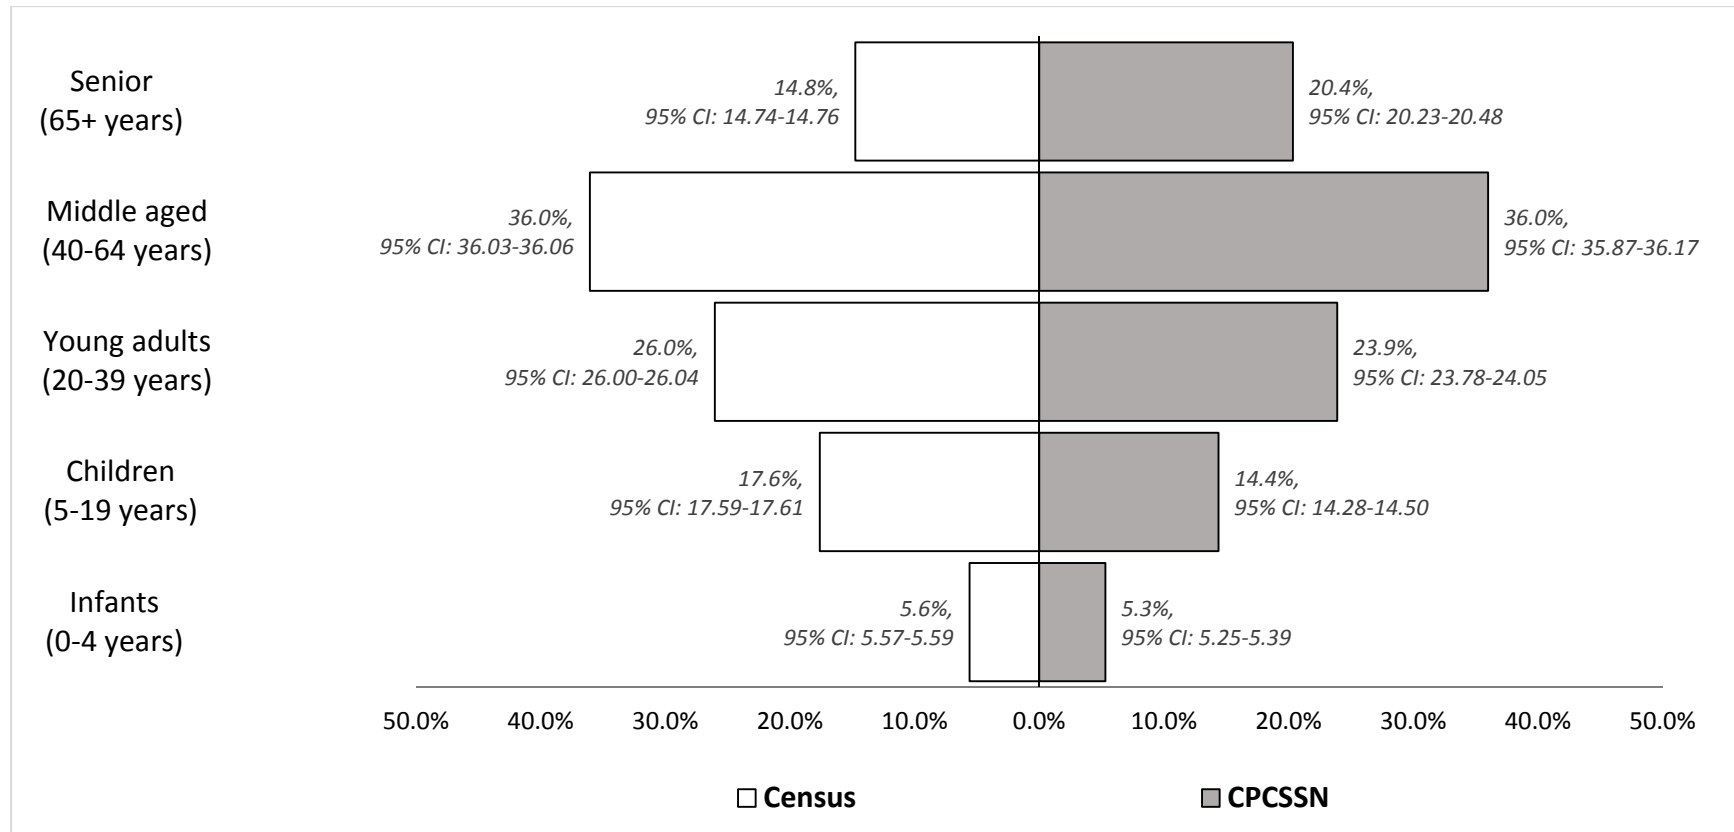

Appendix to: Queenan JA, Williamson T, Khan S, Drummond N, Garies S, Morkem R, Birtwhistle R. Representativeness of patients and providers in the Canadian Primary Care Sentinel Surveillance Network: a cross-sectional study. *CMAJ Open* 2016. DOI:10.9778/cmajo.20140128.

Copyright © 2016 The Author(s) or their employer(s).

To receive this resource in an accessible format, please contact us at [cmajgroup@cmaj.ca](mailto:cmajgroup@cmaj.ca).

**Figure S2A: Age pyramid of National Males: CPCSSN vs. Census**

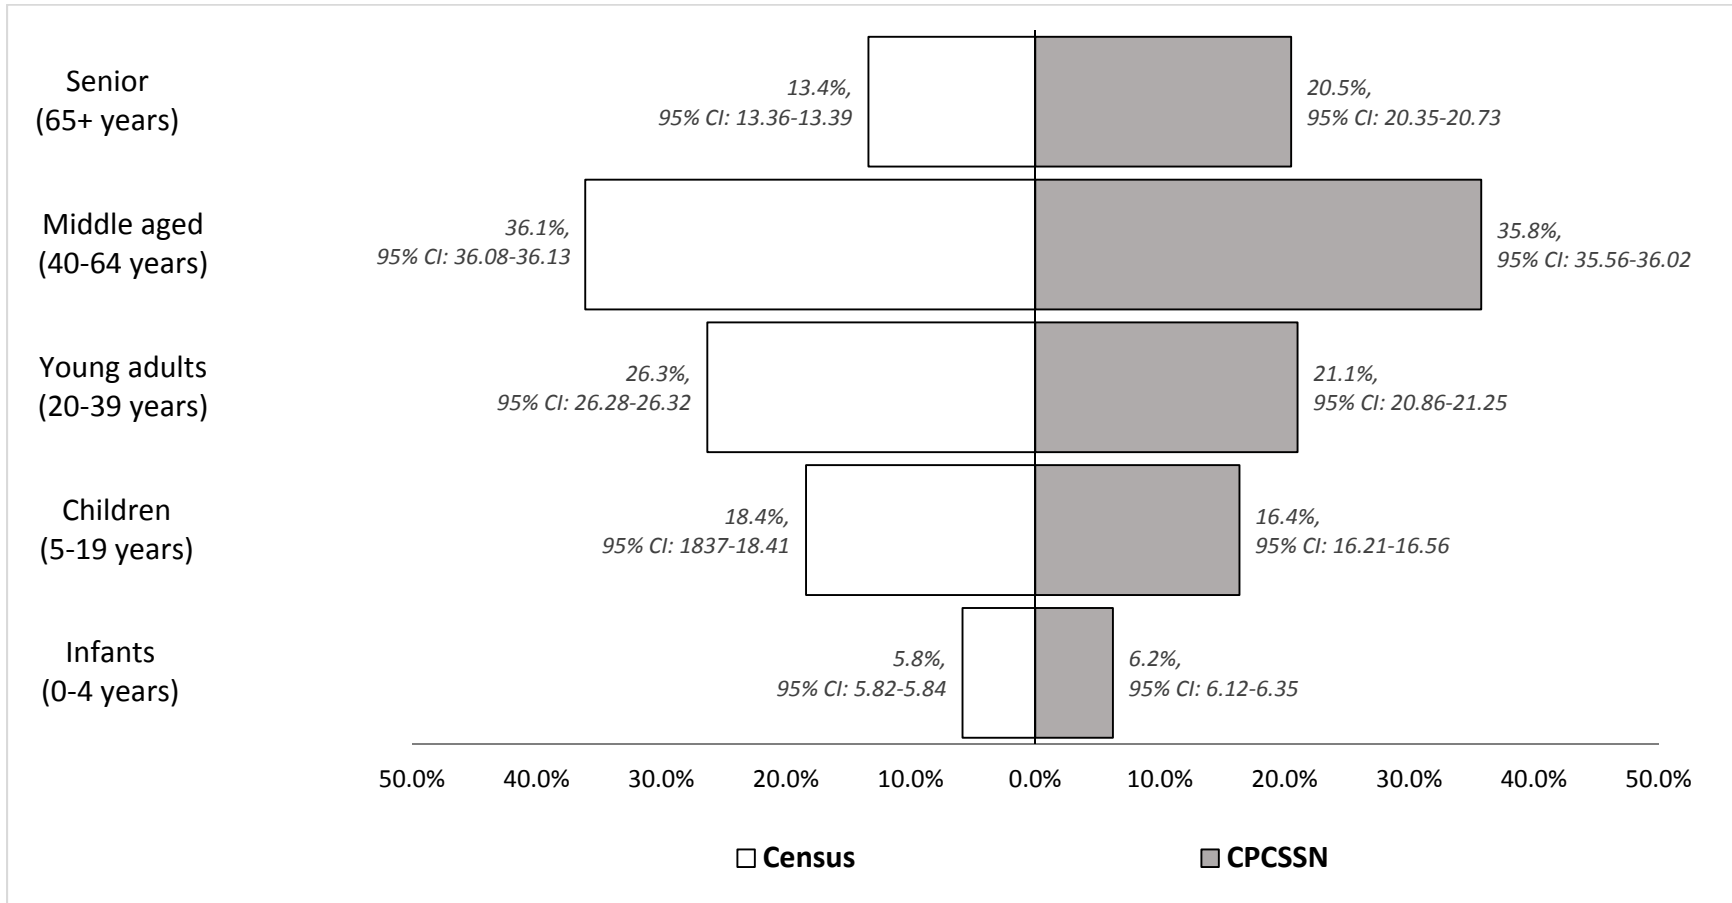

**Figure S2B: Age pyramid of National Females: CPCSSN vs. Census**

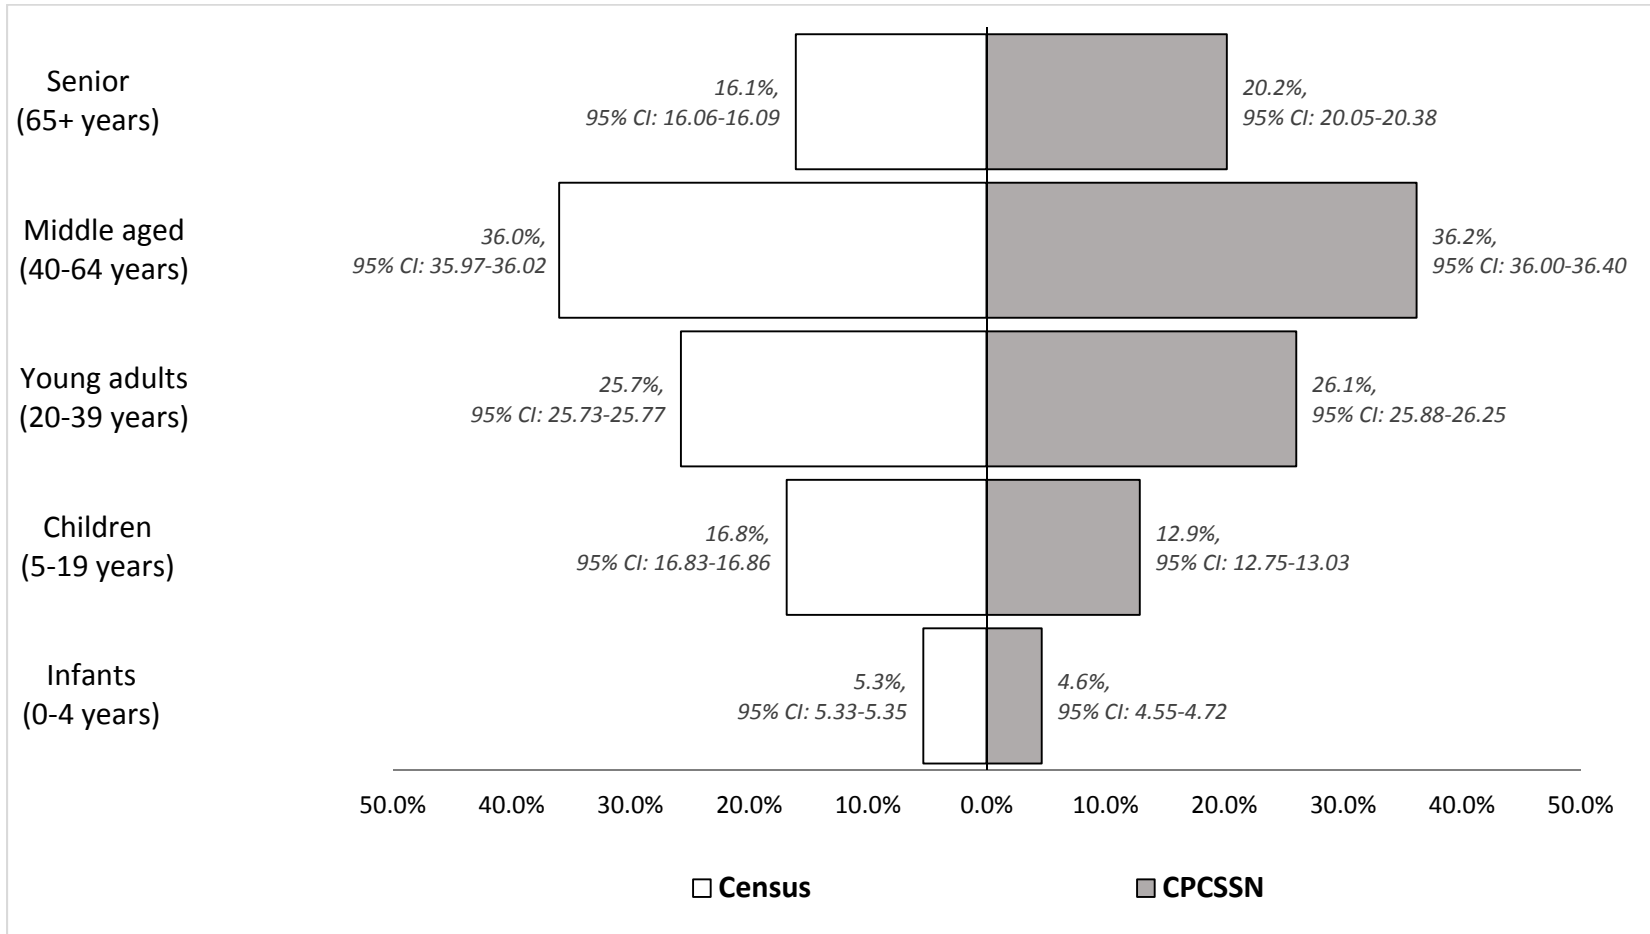

**Figure S3A: Age pyramid of Alberta Males: CPCSSN vs. Census**

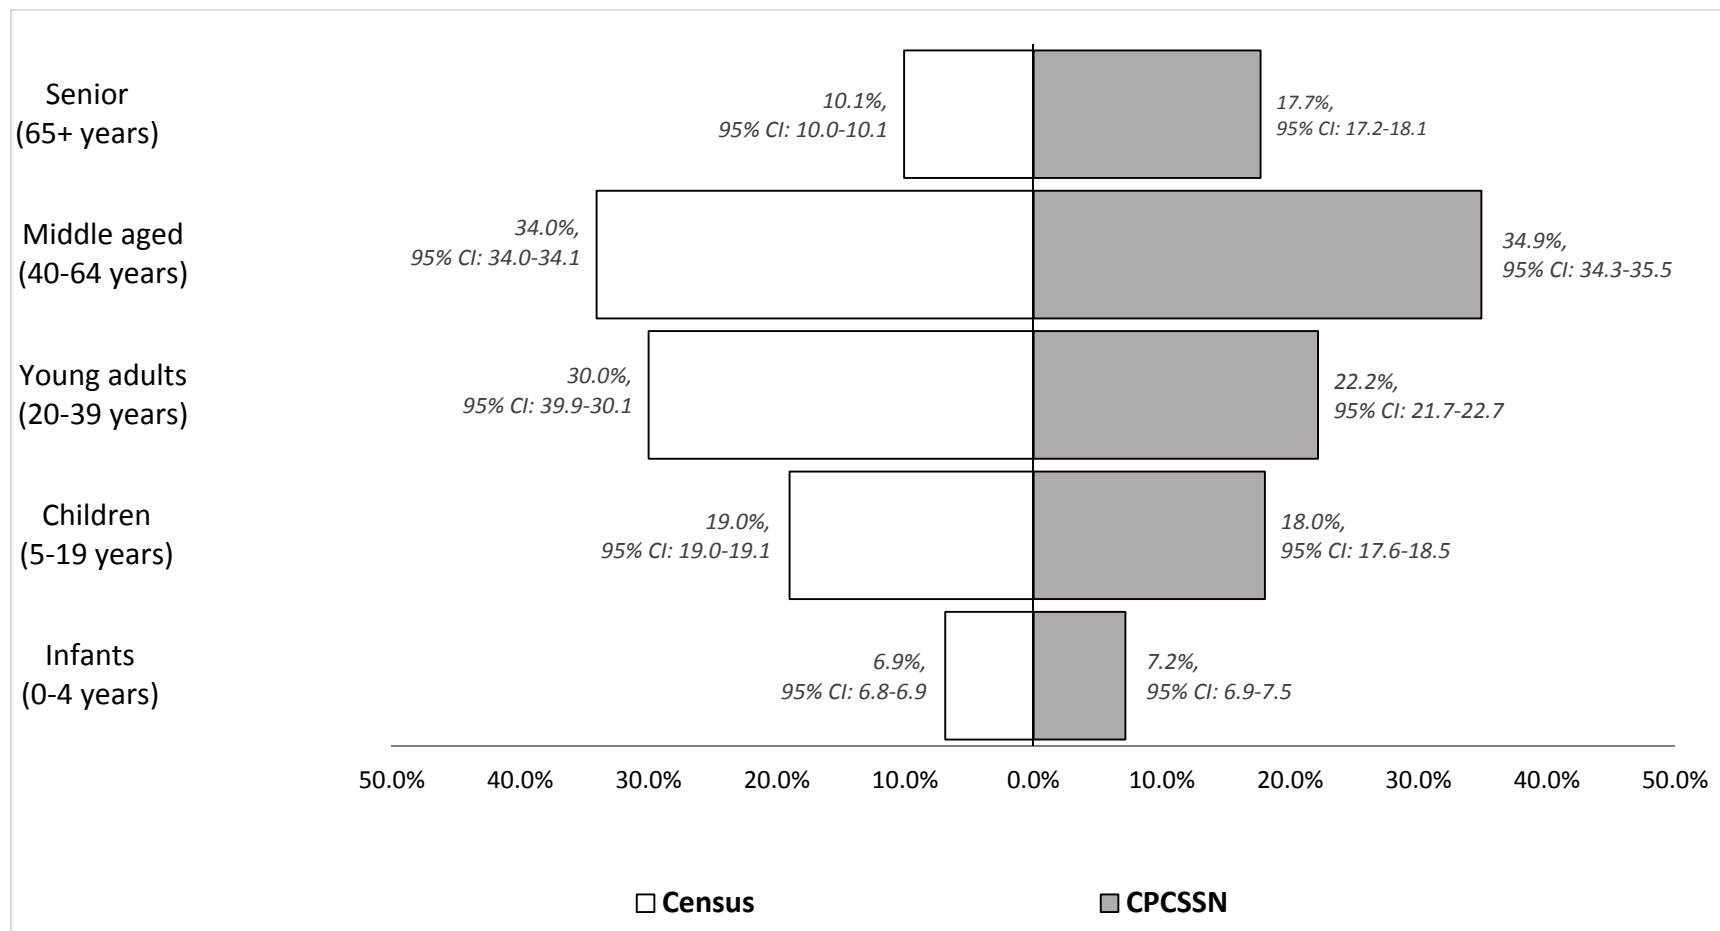

**Figure S3B: Age pyramid of Alberta Females: CPCSSN vs. Census**

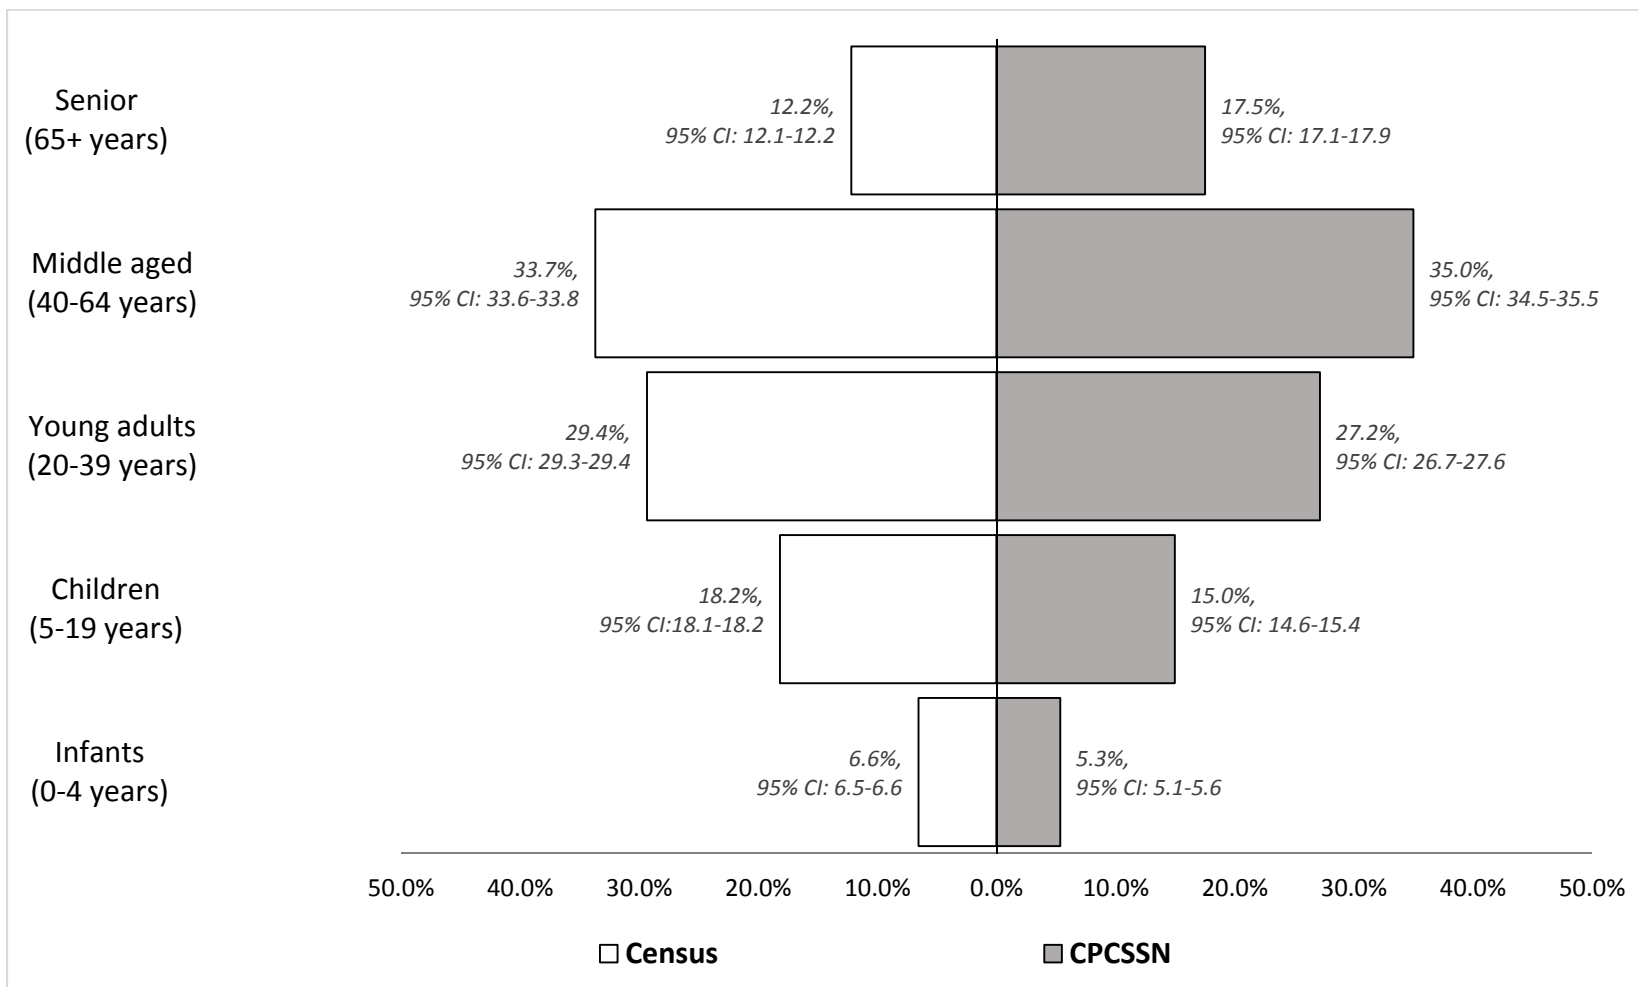

**Figure S4A: Age pyramid of Ontario Males: CPCSSN vs. Census**

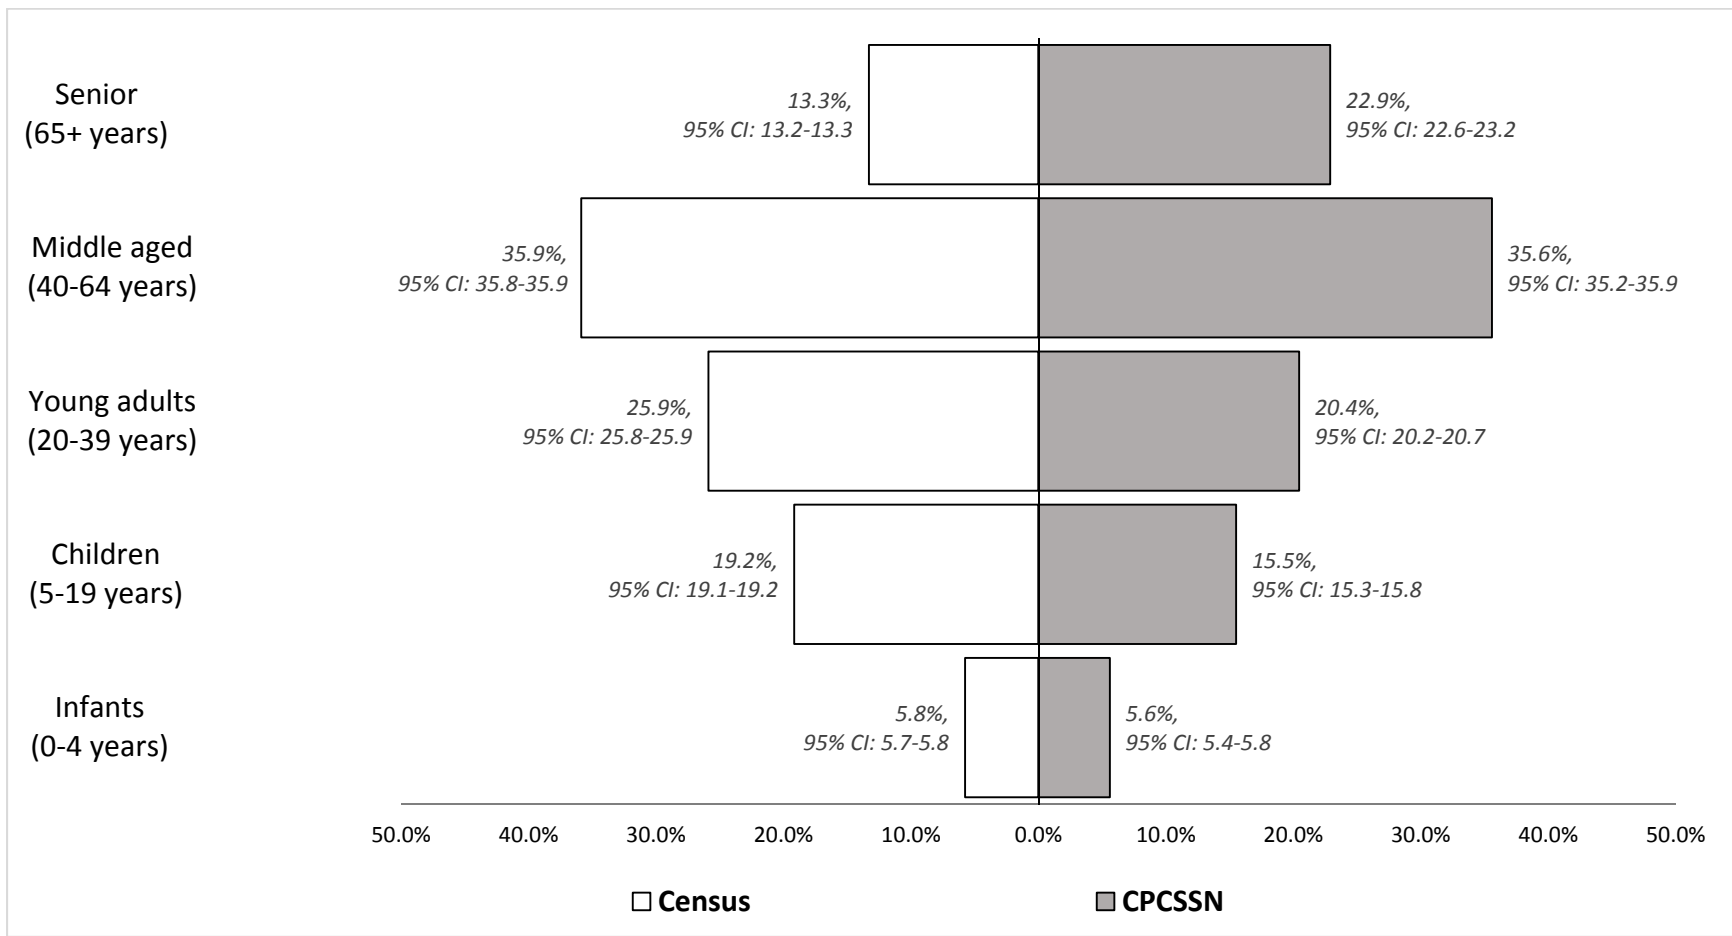

**Figure S4B: Age pyramid of Ontario Females: CPCSSN vs. Census**

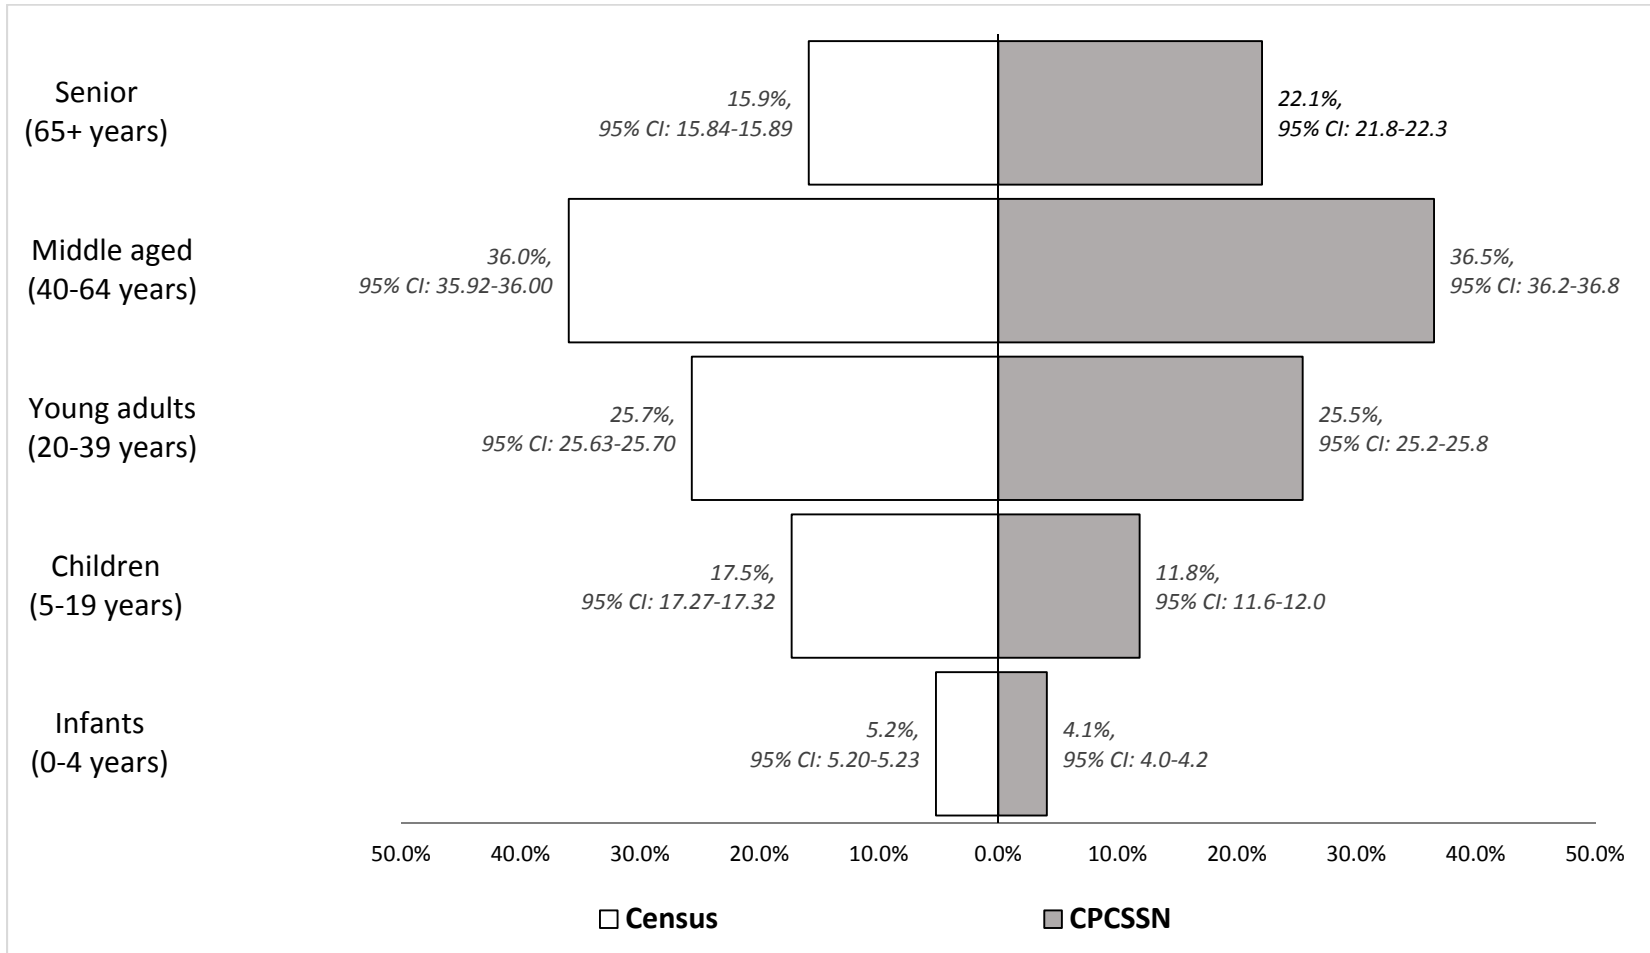

**Figure S5A: Age pyramid of Quebec Males: CPCSSN vs. Census**

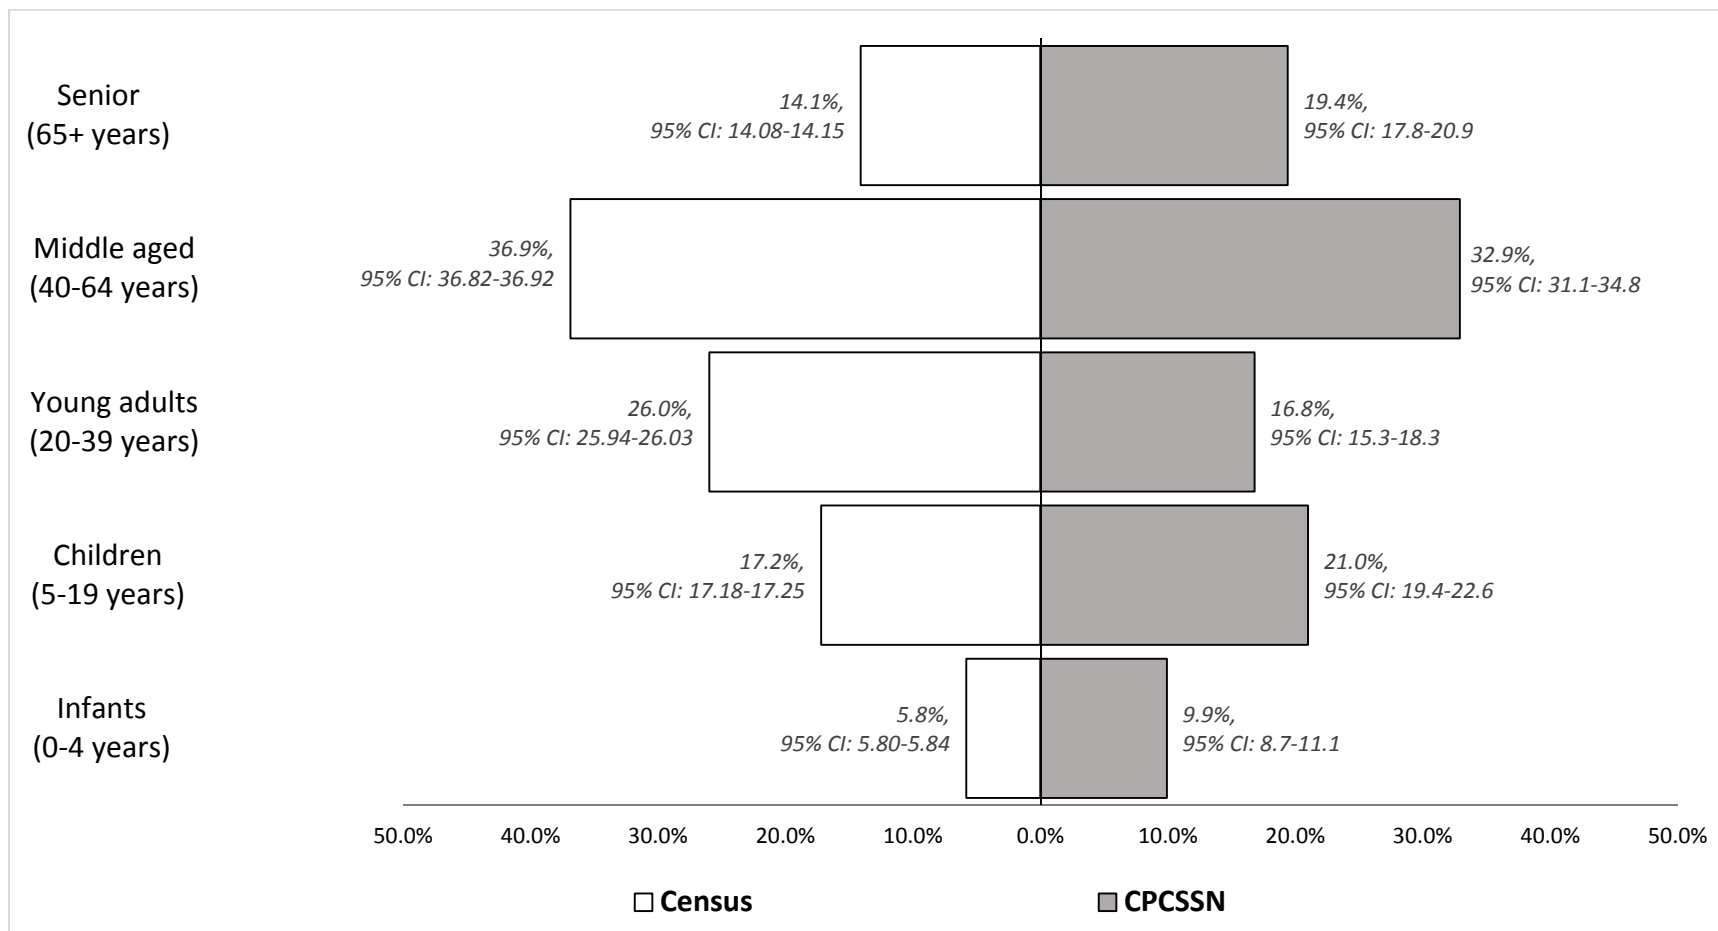



**Figure S5B: Age pyramid of Quebec Females: CPCSSN vs. Census**

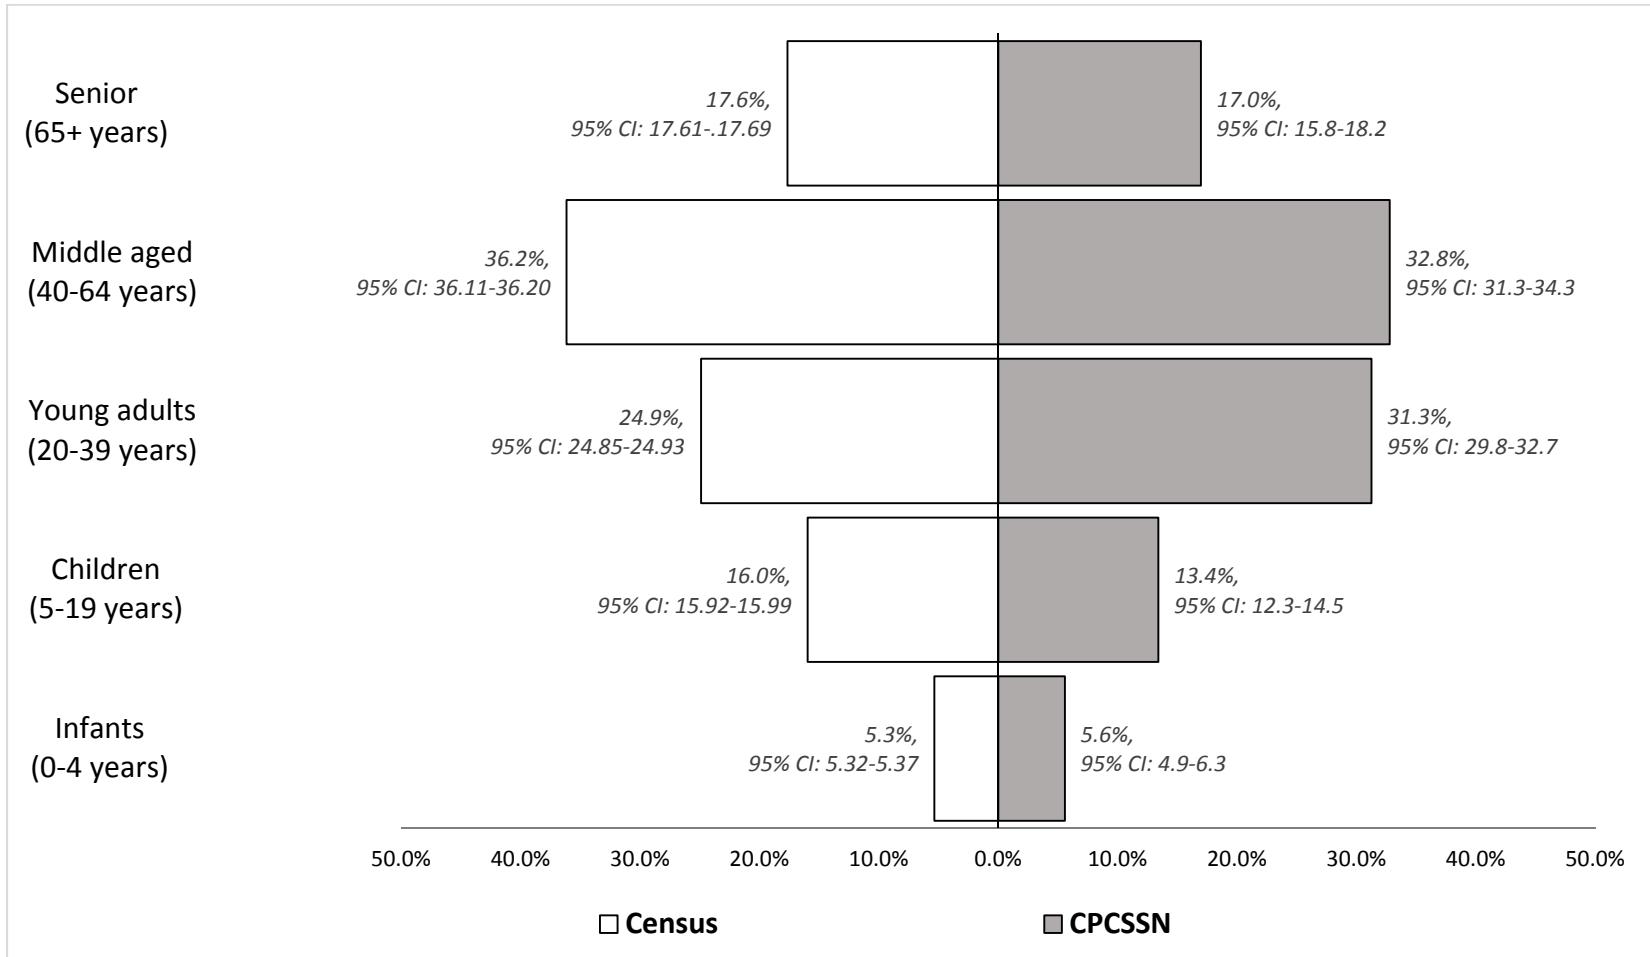

**Figure S6A: Age pyramid of Newfoundland and Labrador Males: CPCSSN vs. Census**

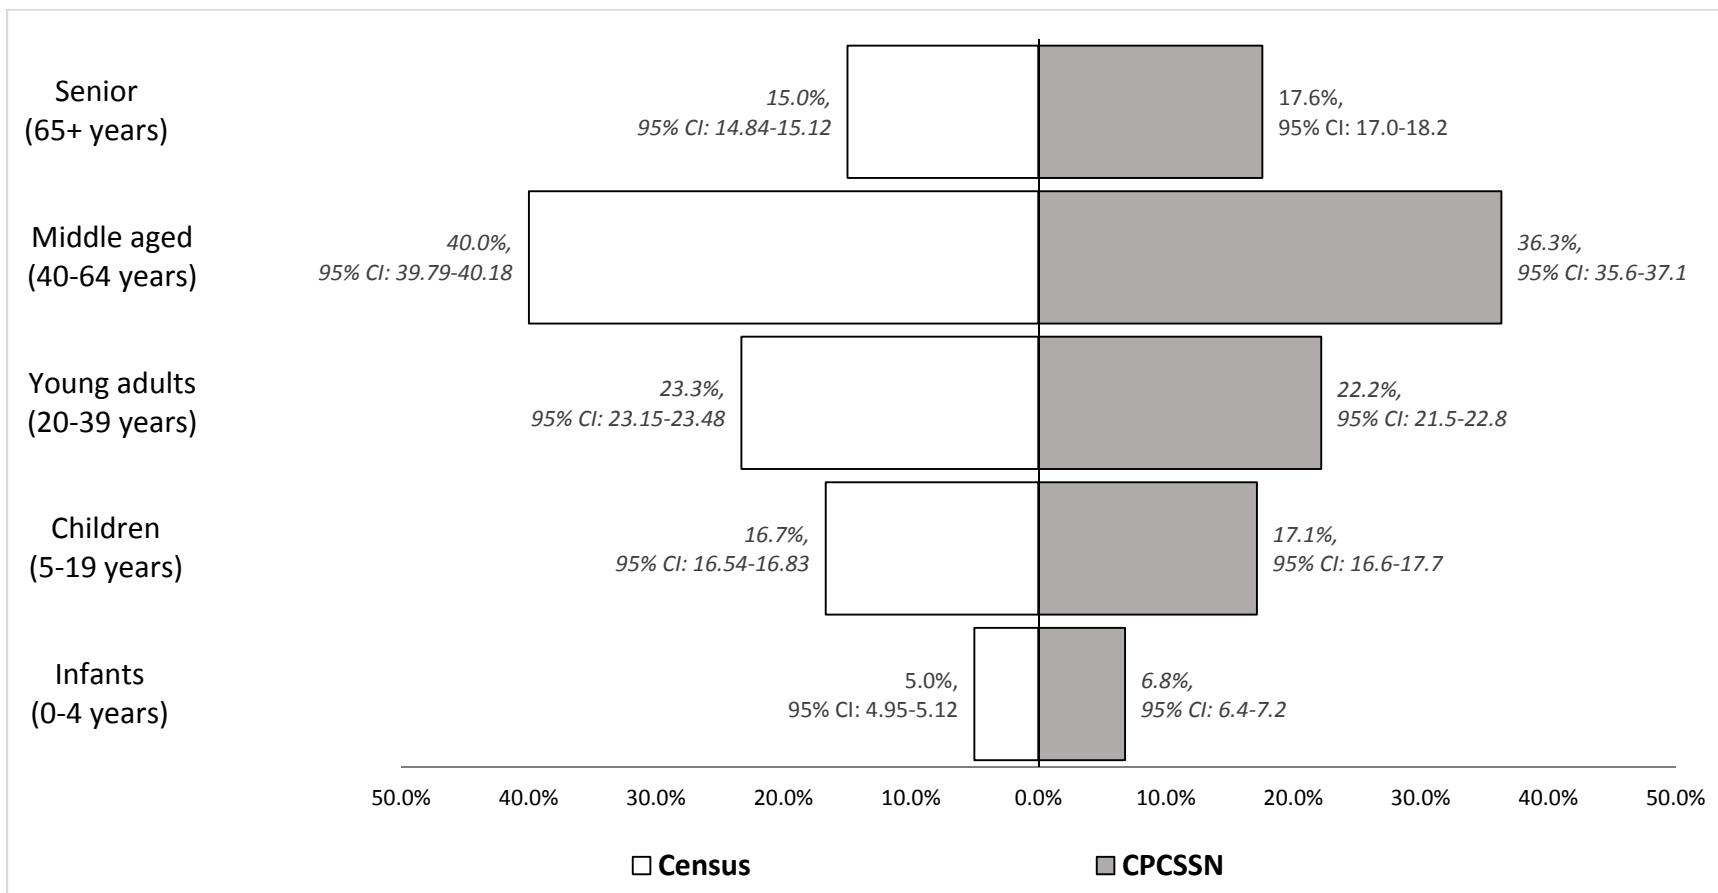

**Figure S6B: Age pyramid of Newfoundland and Labrador Females: CPCSSN vs. Census**

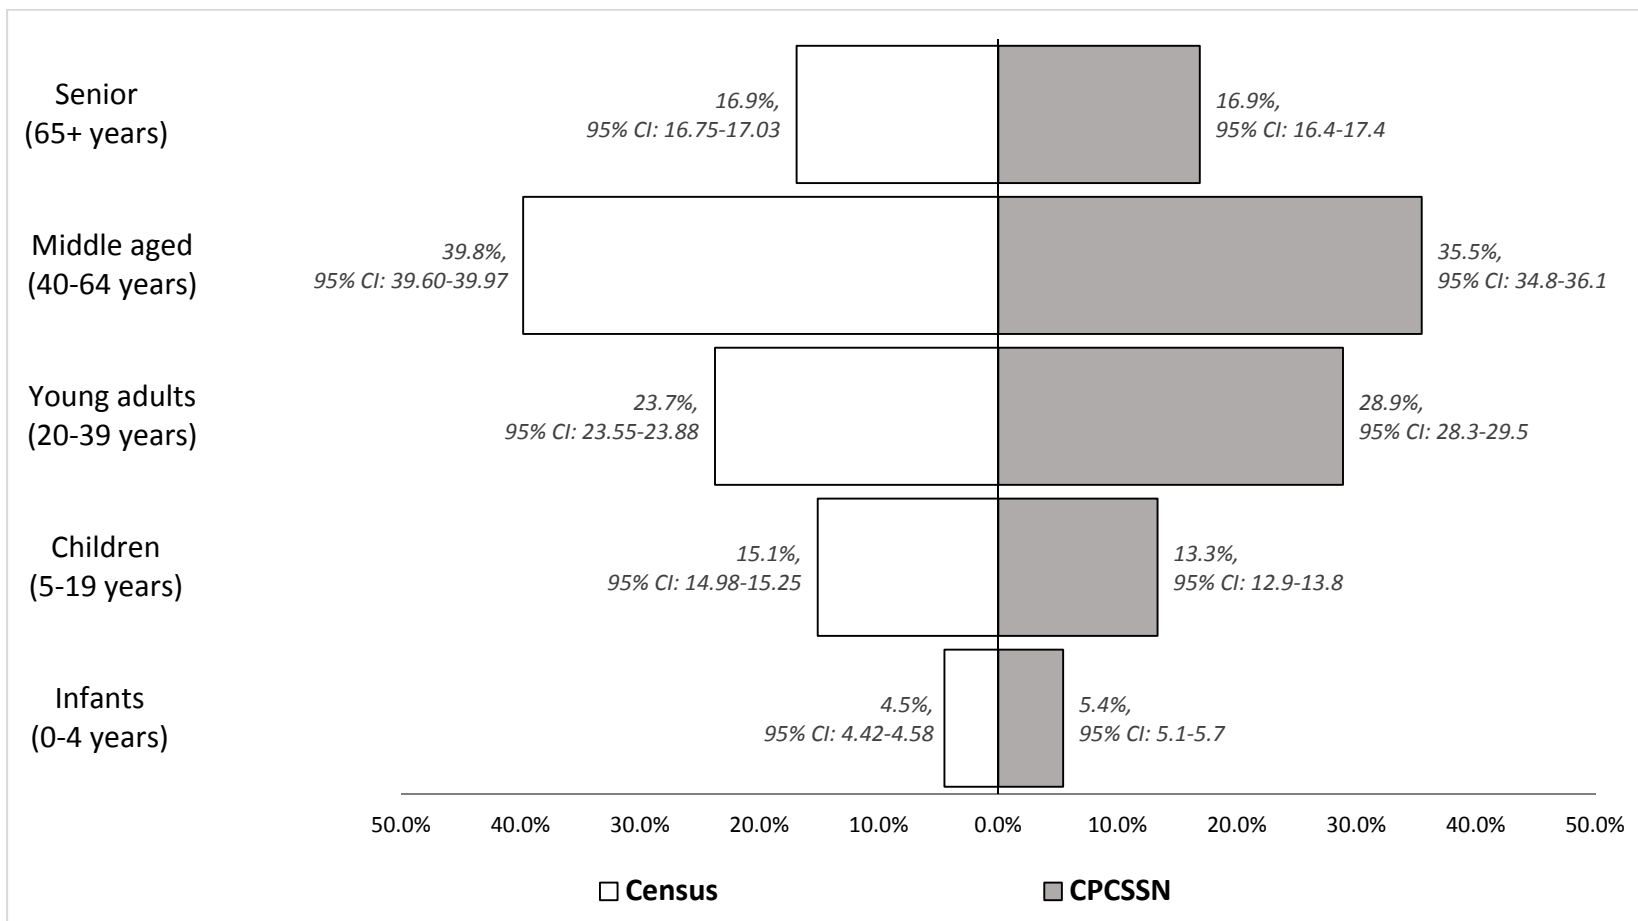

**Figure S7A: Age pyramid of Manitoba Males: CPCSSN vs. Census**

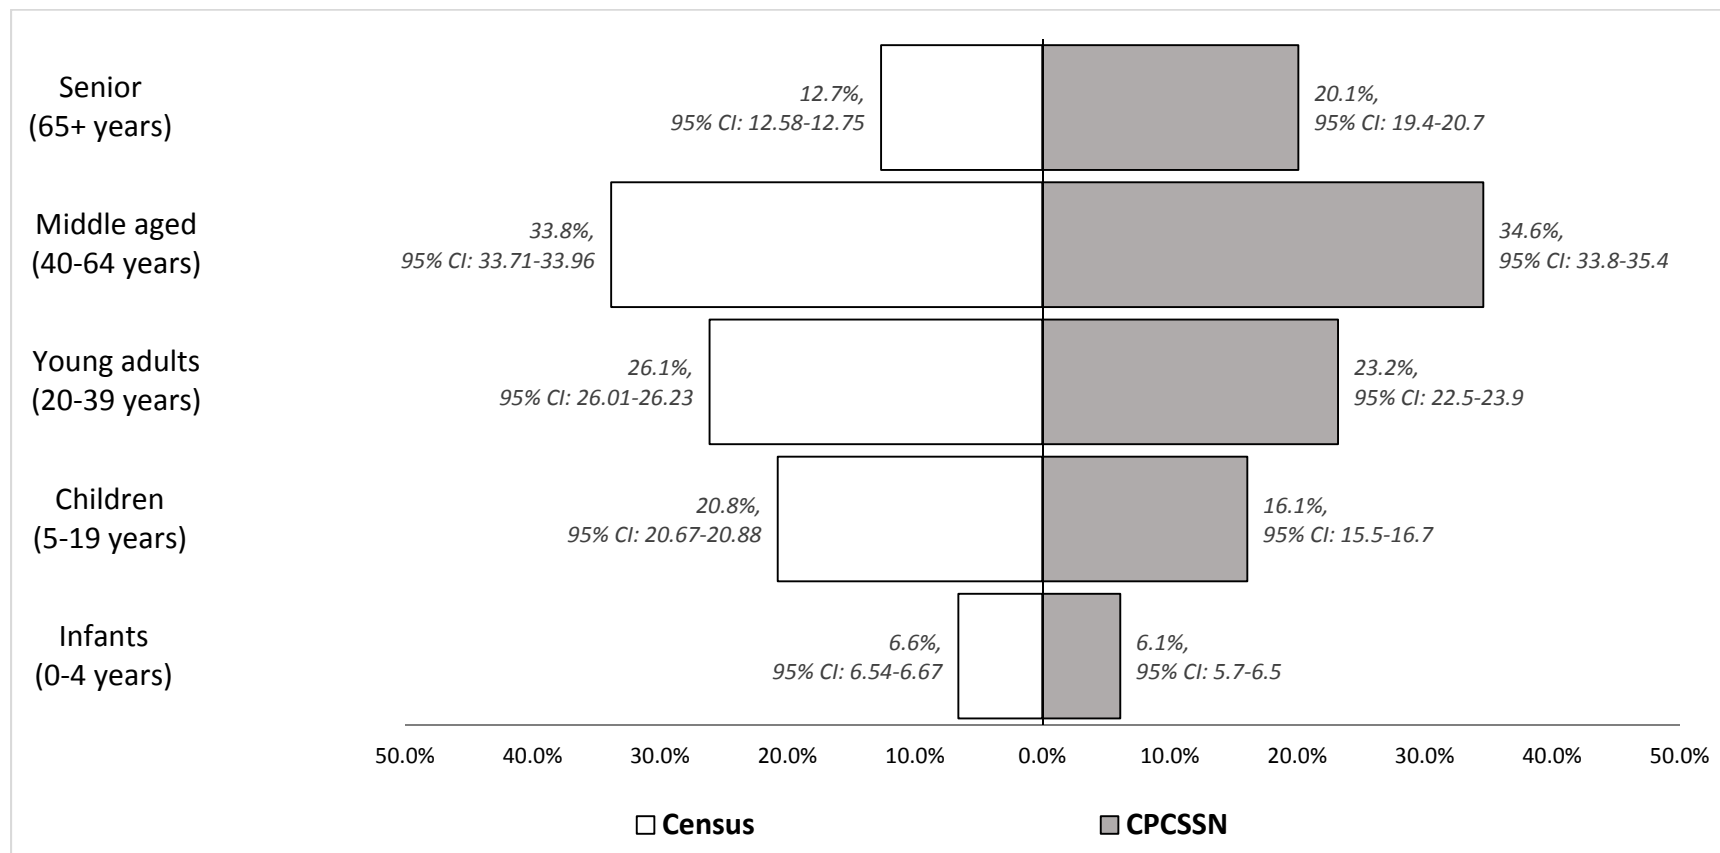

**Figure S7B: Age pyramid of Manitoba Females: CPCSSN vs. Census**

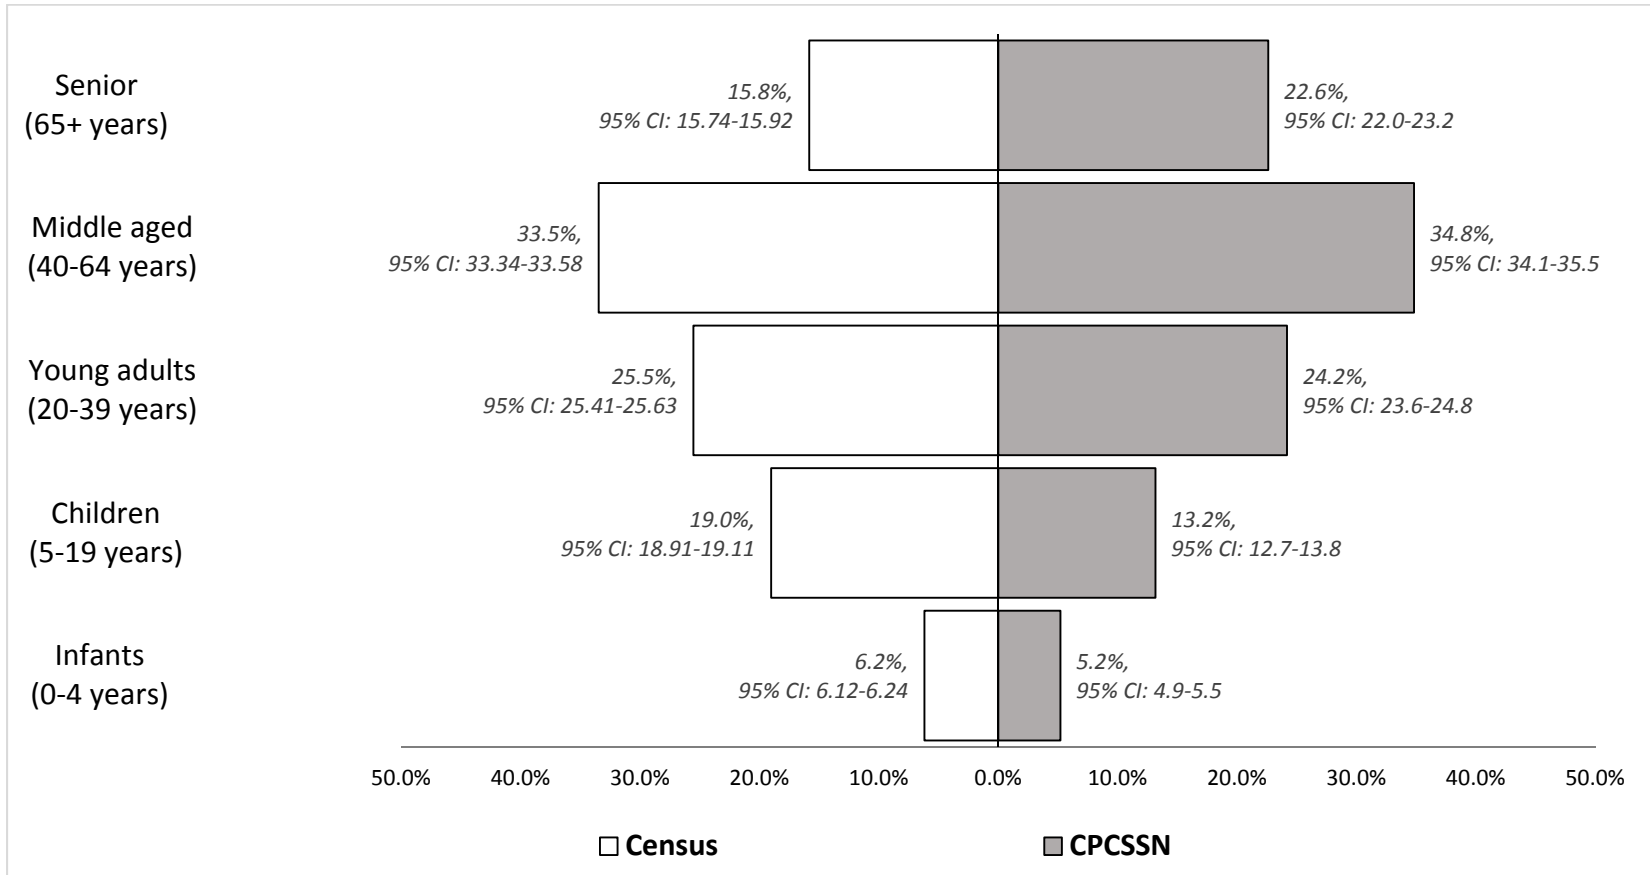

**Figure S8A: Age pyramid of Nova Scotia Males: CPCSSN vs. Census**

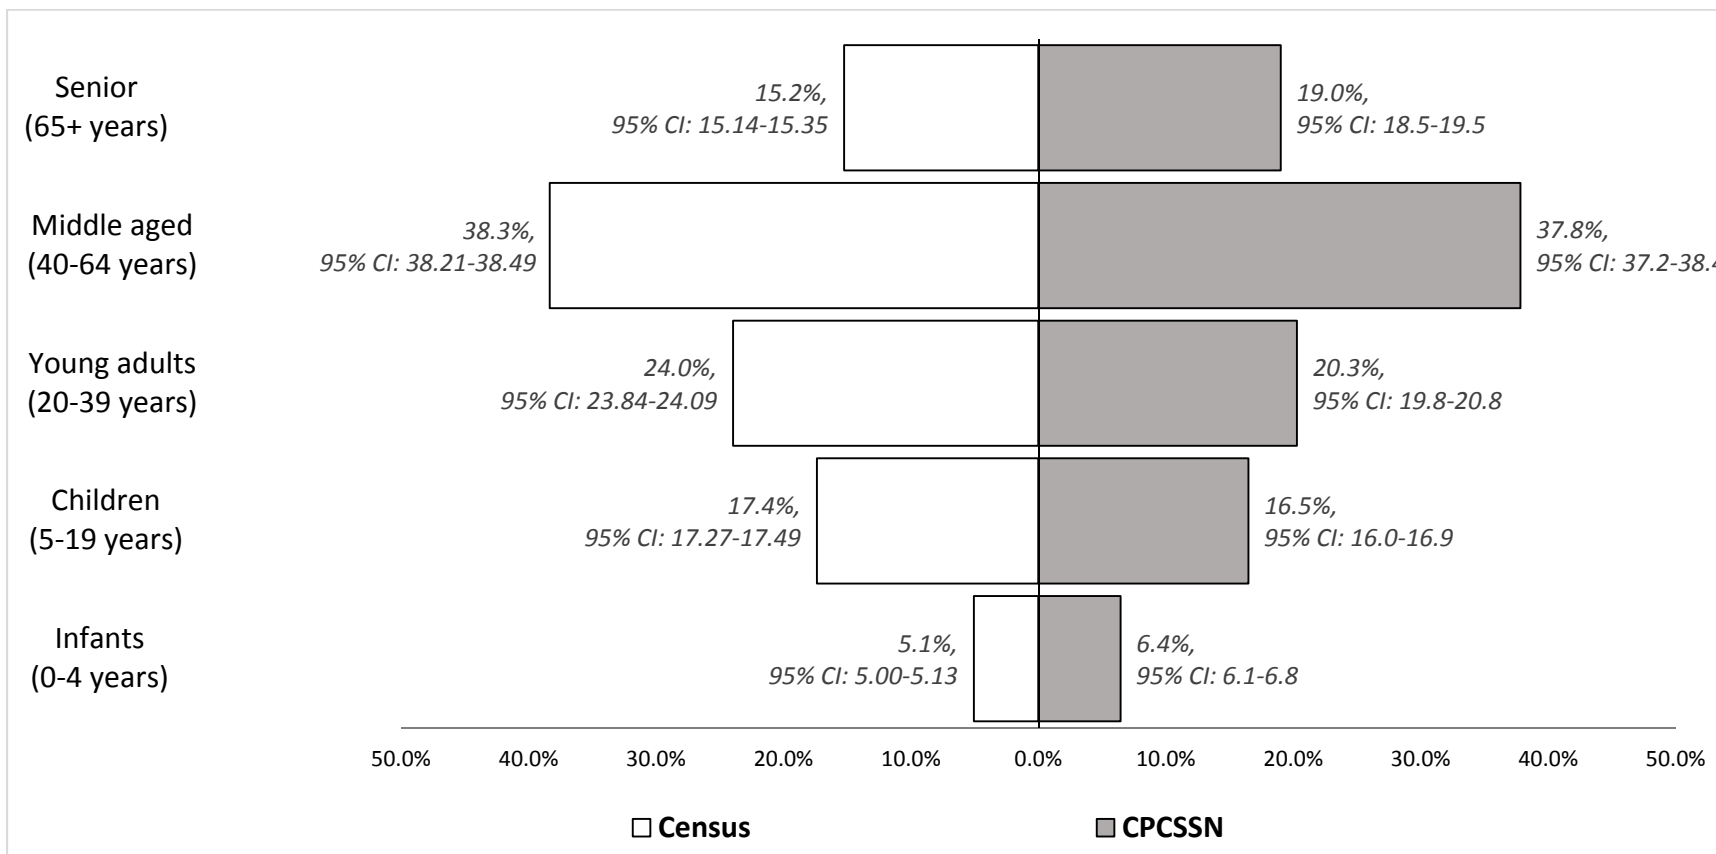

**Figure S8B: Age pyramid of Nova Scotia Females: CPCSSN vs. Census**

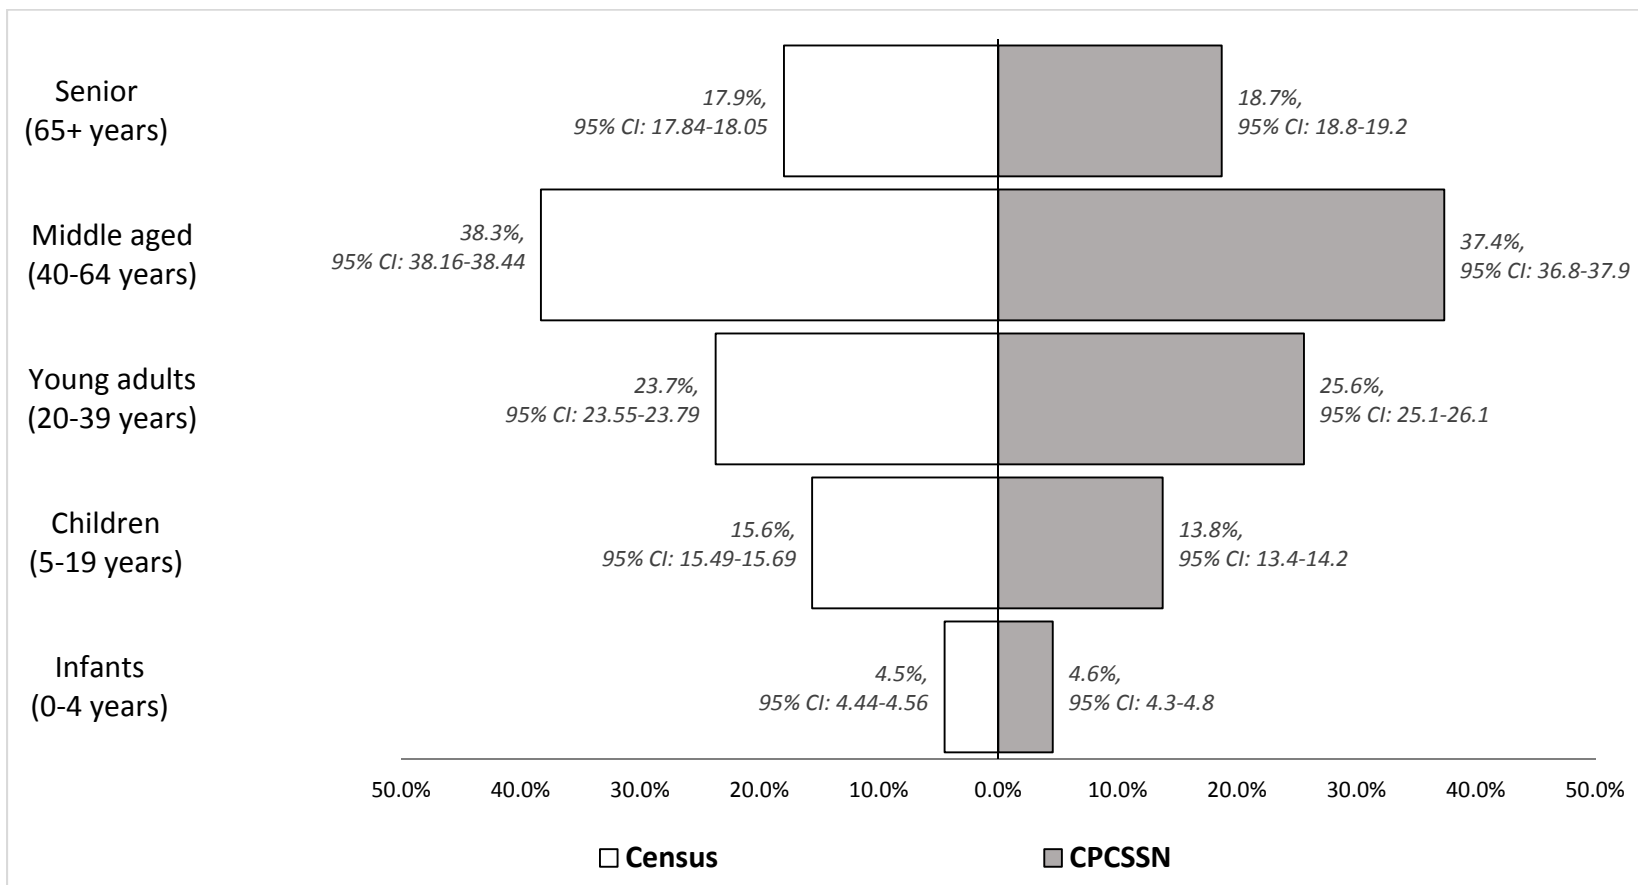

**Figure S9A: Age pyramid of British Columbia Males: CPCSSN vs. Census**

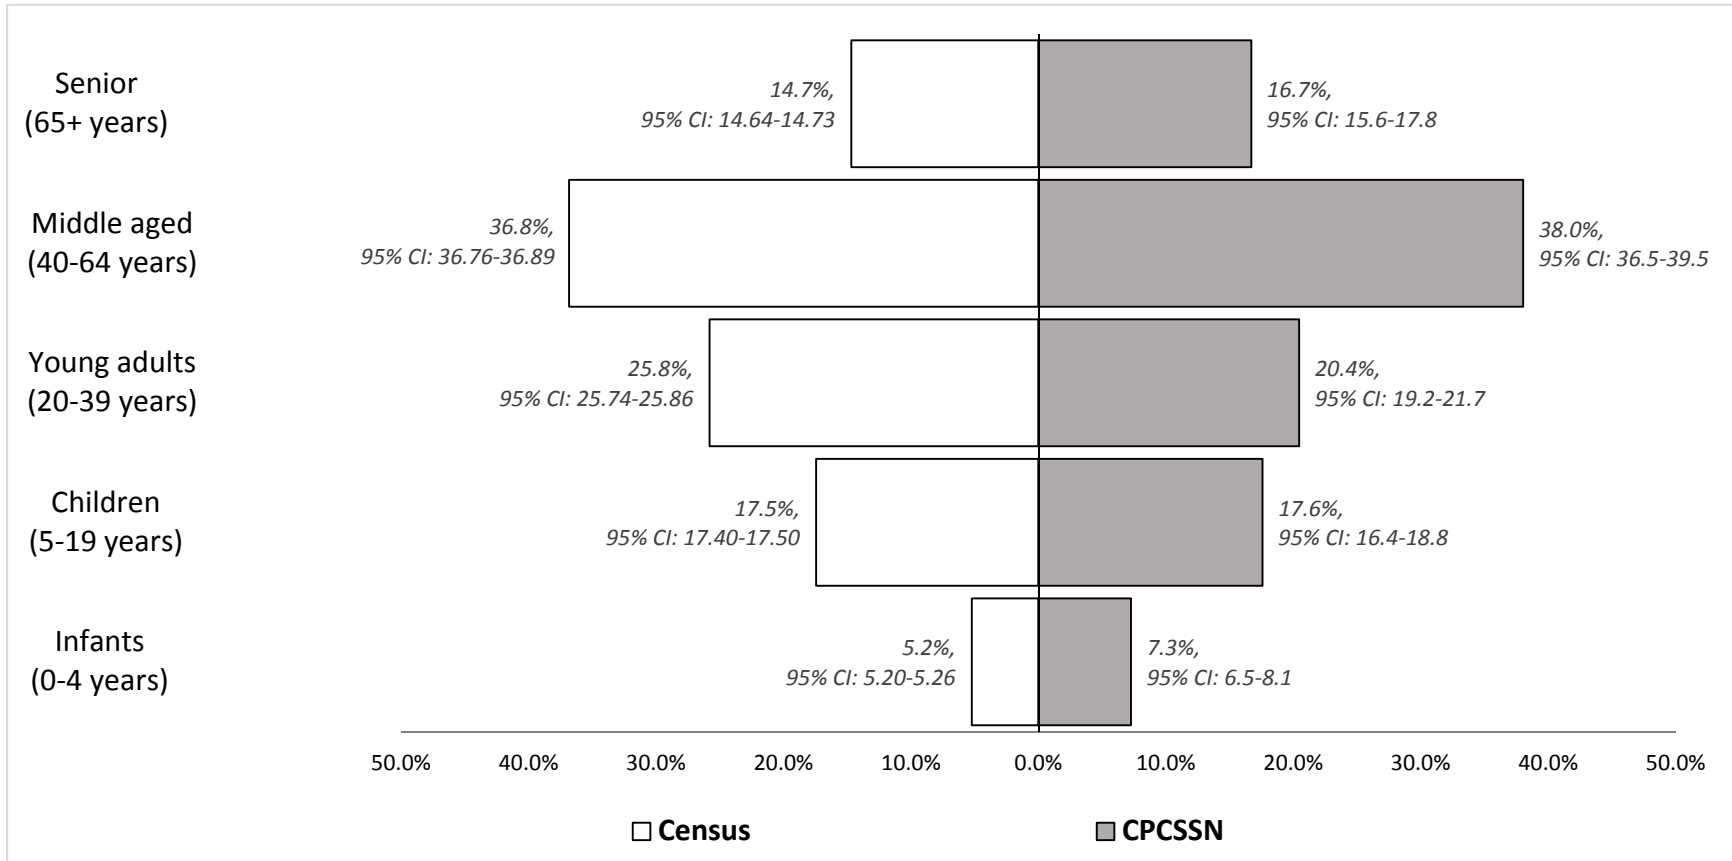



**Figure S9B: Age pyramid of British Columbia Females: CPCSSN vs. Census**

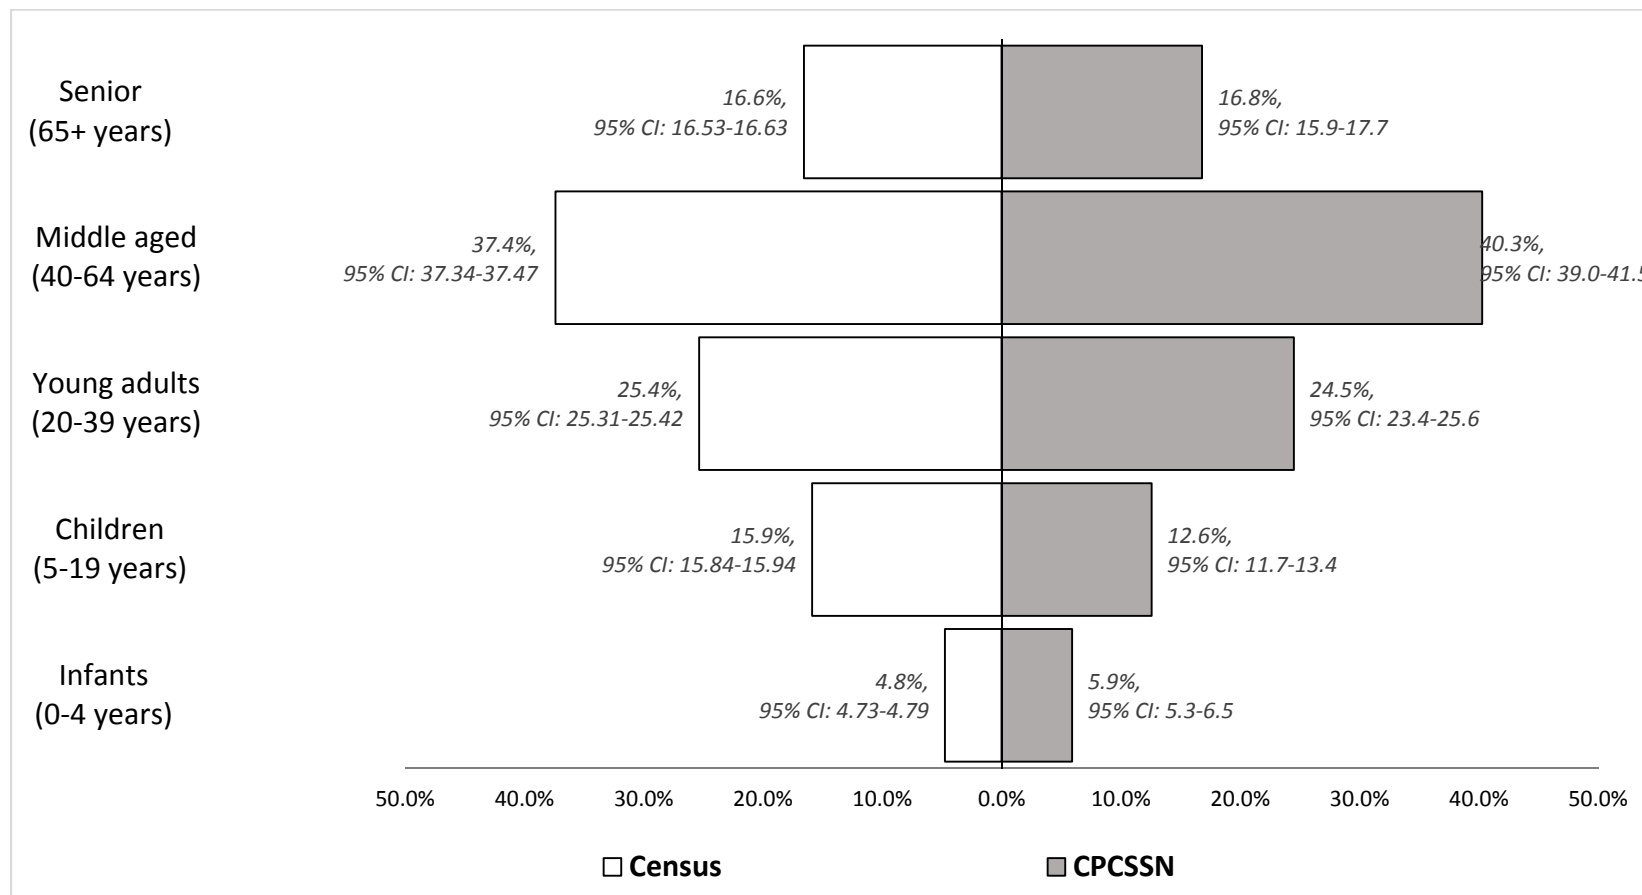

Supplement: open-2014-0128-1-at.pdf [file open-2014-0128-1-at.pdf]
